# Supplementary material for: Combined LRRK2 mutation, aging and chronic low dose oral rotenone as a model of Parkinson’s disease
Source: PubMed Central journal article supplement (PMC5241661; doi:10.1038/srep40887), 2017-01-18
Supplement: srep40887-s1.pdf [file srep40887-s1.pdf]

## Supplementary Information:

### Combined LRRK2 mutation, aging and chronic low dose oral rotenone as a model of Parkinson's disease

Hui-Fang Liu<sup>1\*</sup>, Philip Wing-Lok Ho<sup>1\*</sup>, Gideon Chi-Ting Leung<sup>1</sup>, Colin Siu-Chi Lam<sup>1</sup>,  
Shirley Yin-Yu Pang<sup>1</sup>, Lingfei Li<sup>1</sup>, Michelle Hiu-Wai Kung<sup>1</sup>, David Boyer Ramsden<sup>2</sup>,  
Shu-Leong Ho<sup>1#</sup>

1. Division of Neurology, Department of Medicine, University of Hong Kong, Hong Kong
2. Institute of Metabolism and Systems Research, University of Birmingham, United Kingdom

\* These authors contributed equally in this paper

Correspondence and requests for materials should be addressed to:

**Prof. Shu-Leong Ho**

Division of Neurology, Department of Medicine,  
University of Hong Kong, Queen Mary Hospital,  
Hong Kong.

Tel.: (852) 2855 3315

Fax: (852) 2974 1171

Email: [slho@hku.hk](mailto:slho@hku.hk)

## Supplementary Figure S1

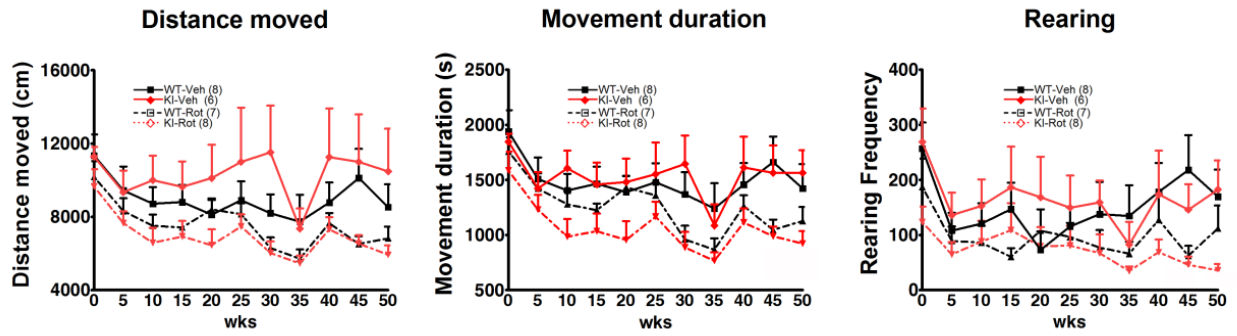

**Supplementary Figure S1.** Raw data of open-field locomotor activity test in four groups of mice [vehicle-treated WT (N=8); vehicle-treated KI (N=6); rotenone-treated WT (N=7); and rotenone-treated KI (N=8)] are presented in parameter-time graphs over 50 weeks at 11 time points. This data set was used to generate the cumulative parameter-time in Fig. 4b. Data are expressed as mean  $\pm$  SEM.

## Supplementary Figure S2

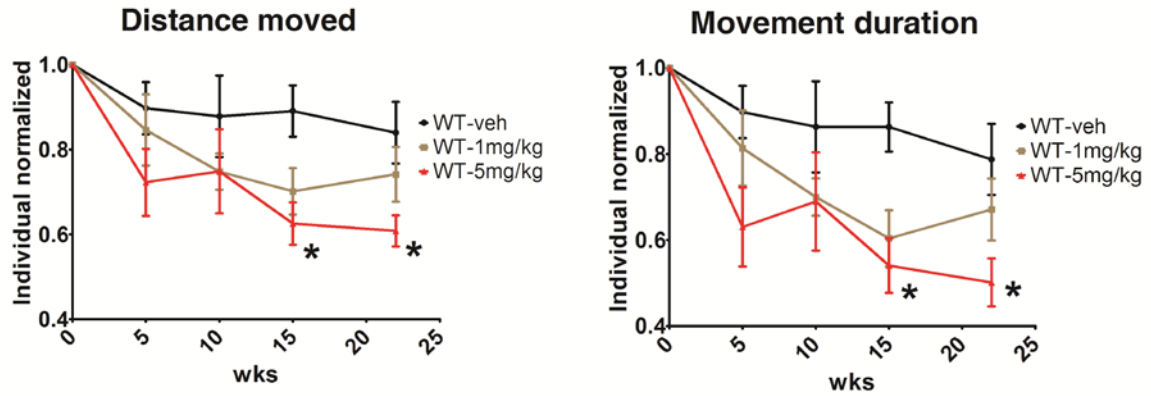

**Supplementary Figure S2.** Preliminary rotenone dose determination in 30-week-old wild-type C57/BL6 mice. Mice were treated orally with 1, 5 mg/kg rotenone, or vehicle twice per week for 22 weeks, and locomotor activity of each mouse was assessed by open field test every five weeks. Oral rotenone treatment at 5 mg/kg after 15 weeks caused significant reduction in both distance moved and movement duration as compared with the vehicle-treated controls ( $p < 0.05$ ). Data (mean  $\pm$  SEM) was analyzed using Student's unpaired t-test; \*,  $P < 0.05$ .

### Supplementary Figure S3

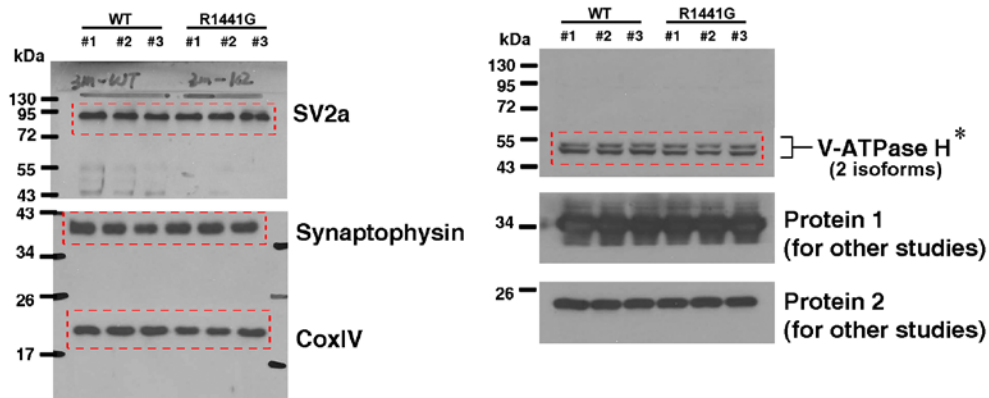

Table showing the raw band intensity measurements by Image J

|        |    | SV2a     | Synaptophysin | COX IV   | V-ATPase H |
|--------|----|----------|---------------|----------|------------|
| WT     | #1 | 16130.55 | 24790.19      | 18205.12 | 18158.38   |
|        | #2 | 14100.09 | 21005.24      | 19890.95 | 16703.92   |
|        | #3 | 13010.24 | 17589.31      | 19348.24 | 16948.74   |
| R1441G | #1 | 14119.07 | 22146.77      | 14478.7  | 14894.55   |
|        | #2 | 14179.24 | 23050.6       | 14130.87 | 12518.72   |
|        | #3 | 18026.33 | 21873.65      | 16258.75 | 15306.67   |

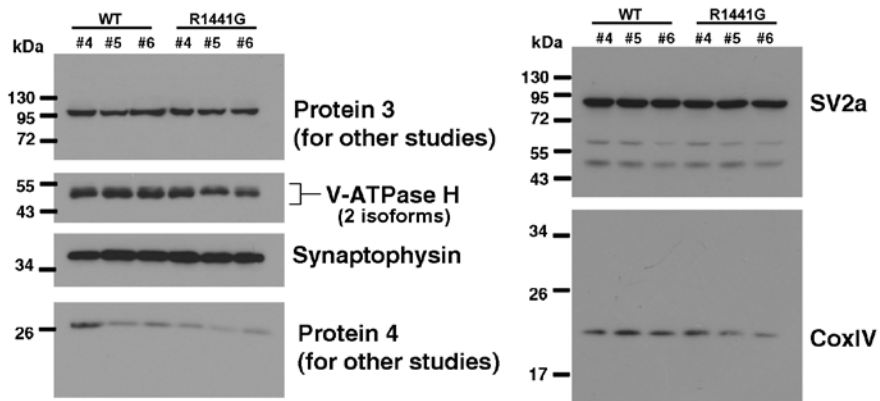

Table showing the raw band intensity measurements by Image J

|        |    | SV2a     | Synaptophysin | COX IV   | V-ATPase H |
|--------|----|----------|---------------|----------|------------|
| WT     | #4 | 20255.45 | 19866.02      | 8406.024 | 17416.38   |
|        | #5 | 20622.16 | 24819.84      | 12086.34 | 19926.14   |
|        | #6 | 19135.62 | 24164.14      | 9226.803 | 18506.31   |
| R1441G | #4 | 19232.92 | 25704.5       | 10561.17 | 16789.89   |
|        | #5 | 19260.62 | 23619.02      | 5524.368 | 13150.17   |
|        | #6 | 18296.14 | 21297.14      | 3925.296 | 12056.53   |

**Supplementary Figure S3.** The raw scans of full length western blots as shown in Figure 3.

The hatched red lines indicate the correct sized bands of the target proteins in Figure 3.

\* Both isoform bands of V-ATPase H were used for quantification.

**Supplementary Tables**

**Supplementary Table S1**

| <b>Tests of Between-Subjects Effects</b>        |                            |     |                 |          |      |
|-------------------------------------------------|----------------------------|-----|-----------------|----------|------|
| Dependent Variable: <b>Distance moved</b>       |                            |     |                 |          |      |
| Source                                          | Type III Sum of Squares    | df  | Mean Square     | F        | Sig. |
| Corrected Model                                 | 878981949.354 <sup>a</sup> | 43  | 20441440.683    | 2.144    | .000 |
| Intercept                                       | 22221726121.661            | 1   | 22221726121.661 | 2331.043 | .000 |
| Genotype                                        | 7121599.627                | 1   | 7121599.627     | .747     | .388 |
| Rotenone                                        | 463784093.742              | 1   | 463784093.742   | 48.651   | .000 |
| age                                             | 241555789.485              | 10  | 24155578.948    | 2.534    | .006 |
| Genotype * Rotenone                             | 78679492.202               | 1   | 78679492.202    | 8.253    | .004 |
| Genotype * age                                  | 29842175.457               | 10  | 2984217.546     | .313     | .977 |
| Rotenone * age                                  | 51410814.984               | 10  | 5141081.498     | .539     | .862 |
| Genotype * Rotenone<br>* age                    | 31145229.539               | 10  | 3114522.954     | .327     | .974 |
| Error                                           | 2621562862.737             | 275 | 9532955.864     |          |      |
| Total                                           | 25509737123.996            | 319 |                 |          |      |
| Corrected Total                                 | 3500544812.091             | 318 |                 |          |      |
| a. R Squared = .251 (Adjusted R Squared = .134) |                            |     |                 |          |      |

**Supplementary Table S2**

| <b>Tests of Between-Subjects Effects</b>     |                           |     |               |          |      |
|----------------------------------------------|---------------------------|-----|---------------|----------|------|
| <b>Dependent Variable: Movement duration</b> |                           |     |               |          |      |
| Source                                       | Type III Sum of Squares   | df  | Mean Square   | F        | Sig. |
| Corrected Model                              | 24346509.057 <sup>a</sup> | 43  | 566197.885    | 2.810    | .000 |
| Intercept                                    | 555040341.586             | 1   | 555040341.586 | 2754.516 | .000 |
| Genotype                                     | 470226.158                | 1   | 470226.158    | 2.334    | .128 |
| Rotenone                                     | 10145727.817              | 1   | 10145727.817  | 50.351   | .000 |
| age                                          | 9373925.418               | 10  | 937392.542    | 4.652    | .000 |
| Genotype * Rotenone                          | 1188017.307               | 1   | 1188017.307   | 5.896    | .016 |
| Genotype * age                               | 521667.314                | 10  | 52166.731     | .259     | .989 |
| Rotenone * age                               | 1436934.470               | 10  | 143693.447    | .713     | .712 |
| Genotype * Rotenone * age                    | 696502.967                | 10  | 69650.297     | .346     | .968 |
| Error                                        | 55413039.995              | 275 | 201501.964    |          |      |
| Total                                        | 633180076.400             | 319 |               |          |      |
| Corrected Total                              | 79759549.052              | 318 |               |          |      |

a. R Squared = .305 (Adjusted R Squared = .197)

**Supplementary Table S3**

| Tests of Between-Subjects Effects               |                         |     |             |         |      |
|-------------------------------------------------|-------------------------|-----|-------------|---------|------|
| Dependent Variable: <b>Rearing frequency</b>    |                         |     |             |         |      |
| Source                                          | Type III Sum of Squares | df  | Mean Square | F       | Sig. |
| Corrected Model                                 | 948339.461 <sup>a</sup> | 43  | 22054.406   | 1.710   | .006 |
| Intercept                                       | 4591728.420             | 1   | 4591728.420 | 356.038 | .000 |
| Genotype                                        | 3492.199                | 1   | 3492.199    | .271    | .603 |
| Rotenone                                        | 423717.275              | 1   | 423717.275  | 32.855  | .000 |
| age                                             | 284718.822              | 10  | 28471.882   | 2.208   | .018 |
| Genotype * Rotenone                             | 31399.174               | 1   | 31399.174   | 2.435   | .120 |
| Genotype * age                                  | 70977.898               | 10  | 7097.790    | .550    | .853 |
| Rotenone * age                                  | 74322.334               | 10  | 7432.233    | .576    | .833 |
| Genotype * Rotenone * age                       | 50431.237               | 10  | 5043.124    | .391    | .950 |
| Error                                           | 3546602.357             | 275 | 12896.736   |         |      |
| Total                                           | 8984735.000             | 319 |             |         |      |
| Corrected Total                                 | 4494941.818             | 318 |             |         |      |
| a. R Squared = .211 (Adjusted R Squared = .088) |                         |     |             |         |      |

**Supplementary Table S1-3.** Raw data of open-field test are analyzed by three-way ANOVA (open-field test parameters: distance moved, movement duration and rearing frequency). Aging and rotenone alone had a significant effect on distance moved, movement duration and rearing frequency. And genotype (LRRK2 mutation) alone had no significant effect on these three parameters. The combination of genotype with

aging also had no significant effect on these three locomotor parameters. However, the combination of genotype and rotenone treatment had a significant effect on distance moved and movement duration, but not rearing frequency.



**Supplementary Table S4**

| <b>Tests of Between-Subjects Effects</b>             |                               |     |                  |          |       |
|------------------------------------------------------|-------------------------------|-----|------------------|----------|-------|
| Dependent Variable: <b>Cumulative distance moved</b> |                               |     |                  |          |       |
| Source                                               | Type III Sum of Squares       | df  | Mean Square      | F        | Sig.  |
| Corrected Model                                      | 228029905135.108 <sup>a</sup> | 43  | 5303021049.654   | 16.375   | .000  |
| Intercept                                            | 842831916132.613              | 1   | 842831916132.613 | 2602.511 | .000  |
| age                                                  | 209825572372.040              | 10  | 20982557237.204  | 64.790   | .000  |
| Genotype                                             | 30967575.283                  | 1   | 30967575.283     | .096     | .757  |
| Rotenone                                             | 12917522064.256               | 1   | 12917522064.256  | 39.887   | .000  |
| Age*genotype                                         | 191828436.402                 | 10  | 19182843.640     | .059     | 1.000 |
| Genotype *<br>Rotenone                               | 2544340283.628                | 1   | 2544340283.628   | 7.856    | .005  |
| Age * Rotenone                                       | 4908539996.381                | 10  | 490853999.638    | 1.516    | .133  |
| Age * Genotype<br>* Rotenone                         | 974441765.826                 | 10  | 97444176.583     | .301     | .981  |
| Error                                                | 89059663939.305               | 275 | 323853323.416    |          |       |
| Total                                                | 1154553264755.257             | 319 |                  |          |       |
| Corrected Total                                      | 317089569074.414              | 318 |                  |          |       |

a. R Squared = .719 (Adjusted R Squared = .675)

**Supplementary Table S5**

| <b>Tests of Between-Subjects Effects</b>                |                             |     |                 |          |       |
|---------------------------------------------------------|-----------------------------|-----|-----------------|----------|-------|
| Dependent Variable: <b>Cumulative movement duration</b> |                             |     |                 |          |       |
| Source                                                  | Type III Sum of Squares     | df  | Mean Square     | F        | Sig.  |
| Corrected Model                                         | 5588773709.888 <sup>a</sup> | 43  | 129971481.625   | 18.298   | .000  |
| Intercept                                               | 21549149074.448             | 1   | 21549149074.448 | 3033.862 | .000  |
| age                                                     | 5114022482.304              | 10  | 511402248.230   | 71.999   | .000  |
| Genotype                                                | 27711430.478                | 1   | 27711430.478    | 3.901    | .049  |
| Rotenone                                                | 277144696.595               | 1   | 277144696.595   | 39.019   | .000  |
| Age*genotype                                            | 3491723.268                 | 10  | 349172.327      | .049     | 1.000 |
| Genotype *<br>Rotenone                                  | 48806643.810                | 1   | 48806643.810    | 6.871    | .009  |
| Age * Rotenone                                          | 109101774.419               | 10  | 10910177.442    | 1.536    | .126  |
| Age * Genotype *<br>Rotenone                            | 13956560.759                | 10  | 1395656.076     | .196     | .996  |
| Error                                                   | 1953291091.961              | 275 | 7102876.698     |          |       |
| Total                                                   | 29065057864.440             | 319 |                 |          |       |
| Corrected Total                                         | 7542064801.849              | 318 |                 |          |       |
| a. R Squared = .741 (Adjusted R Squared = .701)         |                             |     |                 |          |       |

**Supplementary Table S6**

| Tests of Between-Subjects Effects                       |                           |     |               |         |       |
|---------------------------------------------------------|---------------------------|-----|---------------|---------|-------|
| Dependent Variable: <b>Cumulative rearing frequency</b> |                           |     |               |         |       |
| Source                                                  | Type III Sum of Squares   | df  | Mean Square   | F       | Sig.  |
| Corrected Model                                         | 56847664.035 <sup>a</sup> | 43  | 1322038.698   | 3.112   | .000  |
| Intercept                                               | 179567498.188             | 1   | 179567498.188 | 422.746 | .000  |
| age                                                     | 39172501.049              | 10  | 3917250.105   | 9.222   | .000  |
| Genotype                                                | 3640.635                  | 1   | 3640.635      | .009    | .926  |
| Rotenone                                                | 13165485.958              | 1   | 13165485.958  | 30.995  | .000  |
| Age*genotype                                            | 184024.235                | 10  | 18402.423     | .043    | 1.000 |
| Genotype *<br>Rotenone                                  | 1605495.503               | 1   | 1605495.503   | 3.780   | .049  |
| Age * Rotenone                                          | 3520834.550               | 10  | 352083.455    | .829    | .601  |
| Age * Genotype *<br>Rotenone                            | 248121.840                | 10  | 24812.184     | .058    | 1.000 |
| Error                                                   | 116810313.952             | 275 | 424764.778    |         |       |
| Total                                                   | 348811853.000             | 319 |               |         |       |
| Corrected Total                                         | 173657977.987             | 318 |               |         |       |

a. R Squared = .327 (Adjusted R Squared = .222)

**Supplementary Table S4-6.** Cumulative data of open-field test are analyzed by three-way ANOVA. Aging and rotenone alone had a significant effect on cumulative distance moved, movement duration and rearing frequency. And the effect of genotype alone on cumulative movement duration just reached significance but not

cumulative distance moved or rearing frequency. The combination of genotype with aging also had no significant effect on these three locomotor parameters. However, the combination of genotype and rotenone treatment had a significant effect on these three cumulative locomotor parameters.
